# Supplementary material for: Self-regenerable clay polymer nanocomposite for organophosphate adsorption and degradation
Source: Royal Society of Chemistry journal article supplement (doi:10.1039/d3en00246b), 2023-01-01
Supplement: d3en00246b1.pdf [file d3en00246b1.pdf]

Supporting information

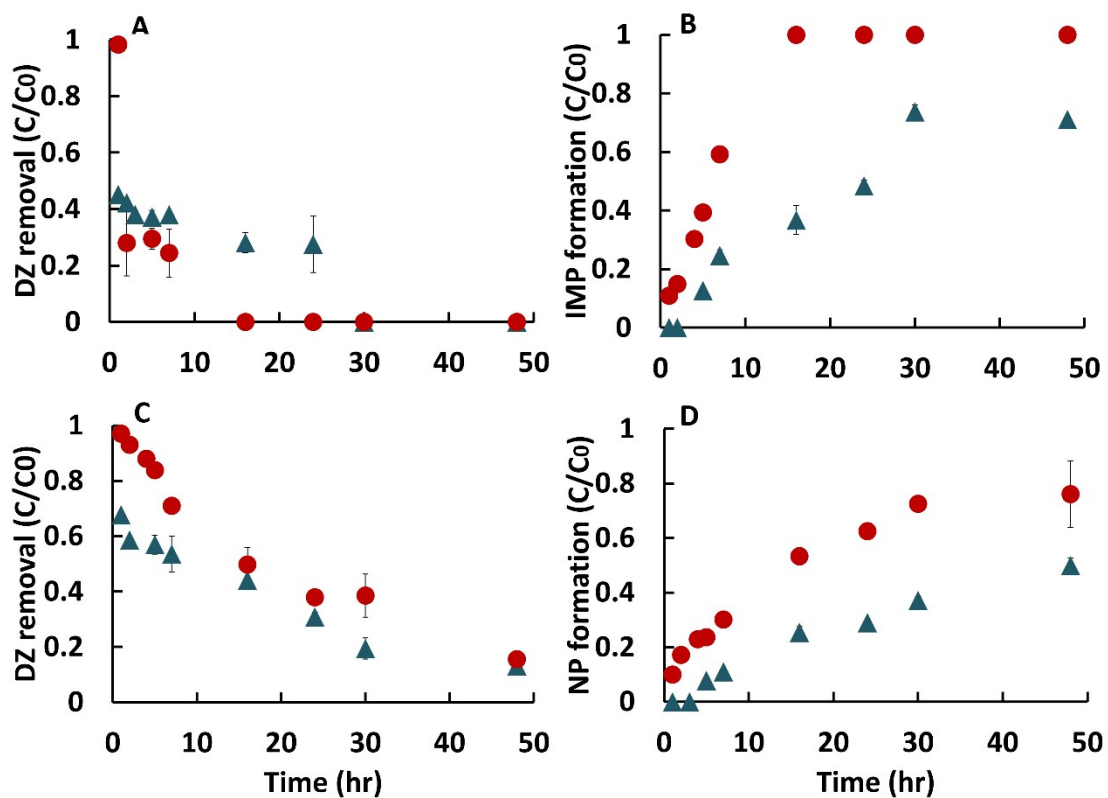

Figure S1 - kinetics (pH 7.6) of DZ and PX removal (A,C), and degradation products formation (B,D).
